# Supplementary material for: Chagas Disease Serological Test Performance in U.S. Blood Donor Specimens
Source: PubMed Central journal article supplement (PMC6879282; doi:10.1128/jcm.01217-19), 2019-11-22
Supplement: JCM.01217-19-s0001.pdf [file JCM.01217-19-s0001.pdf]

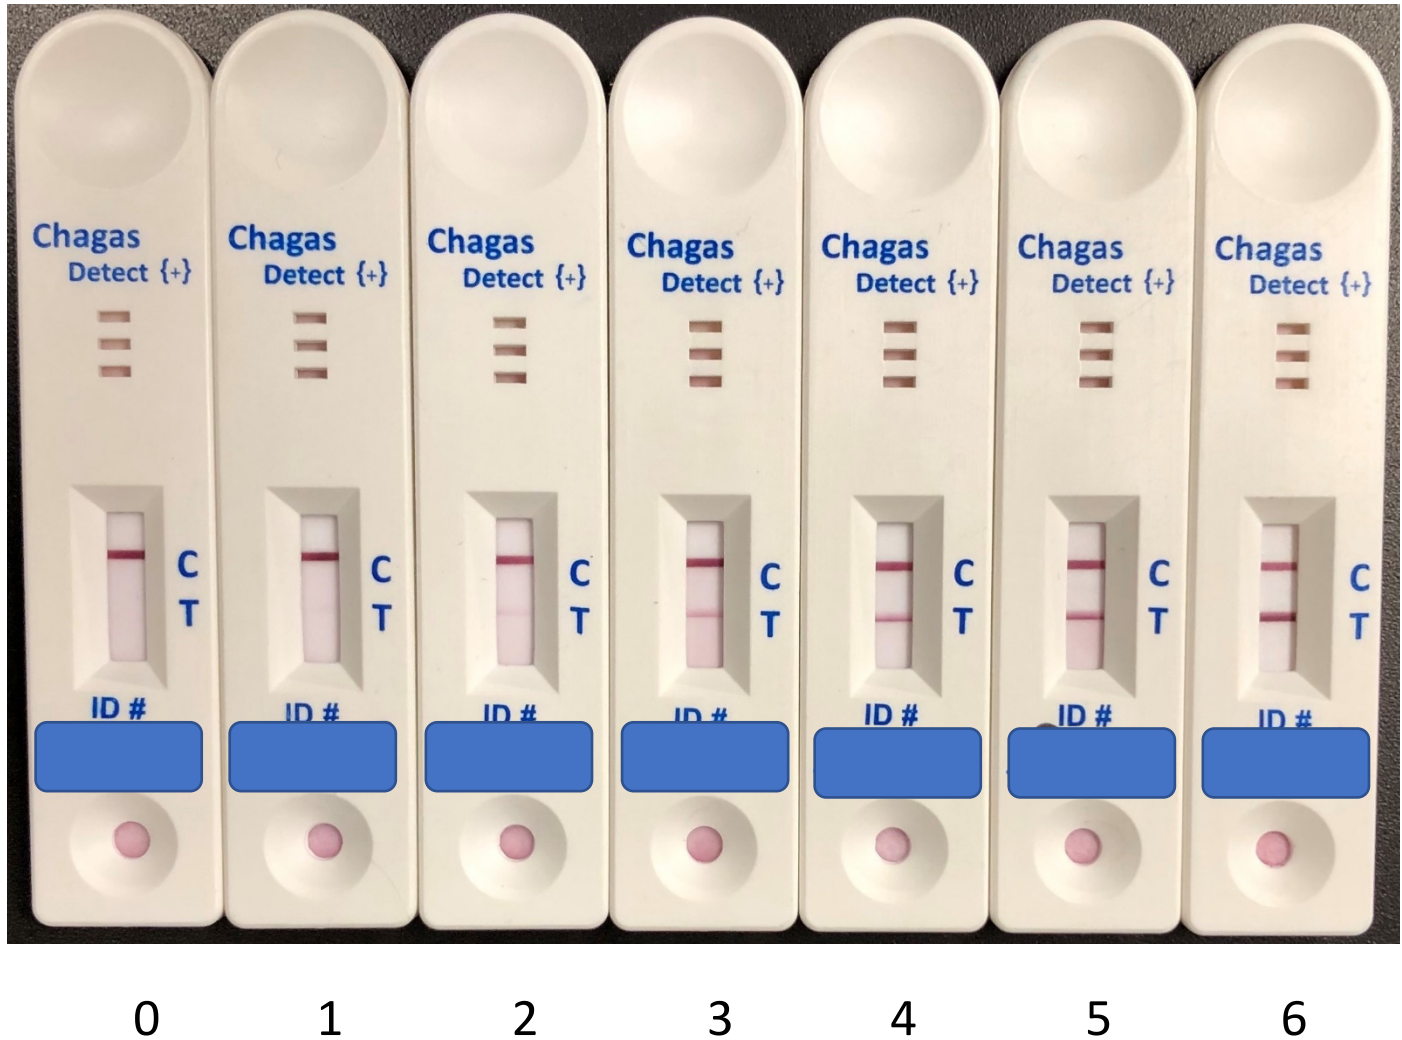

Figure S1. Scoring template for InBios ChagasDetect Plus readings

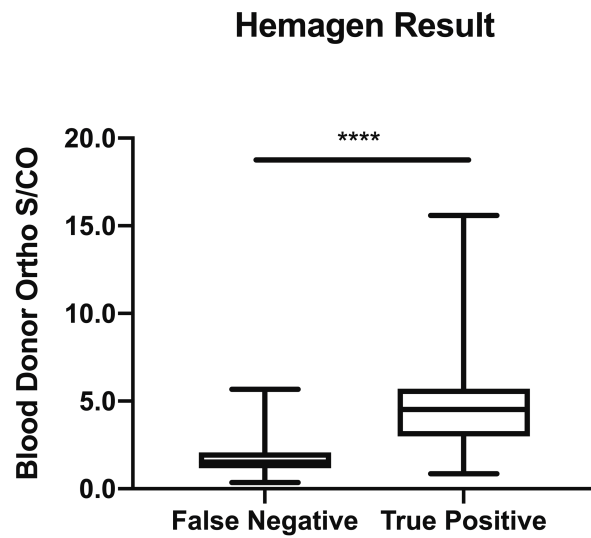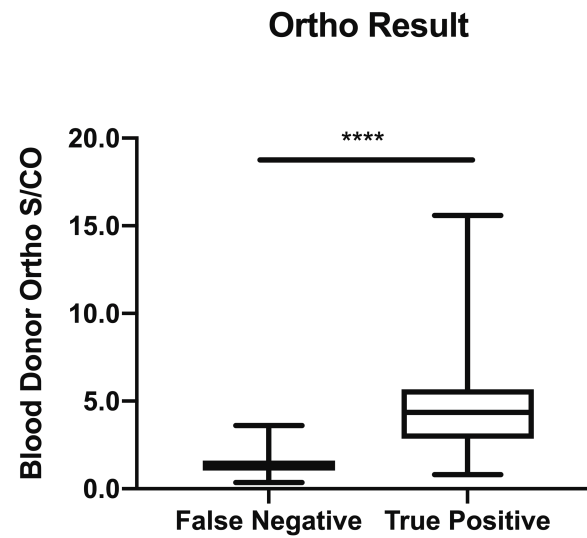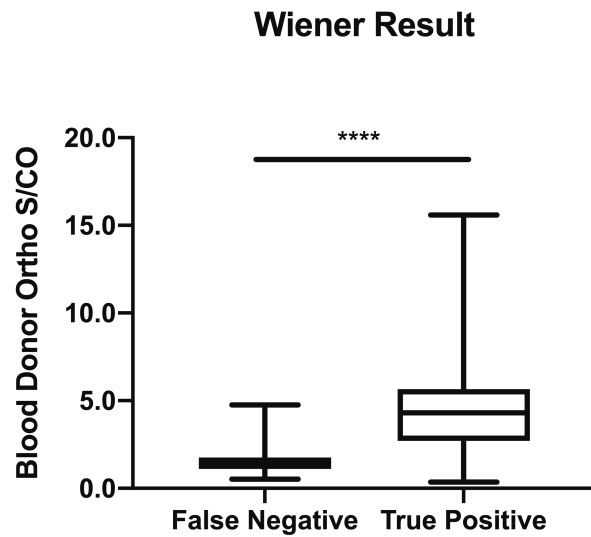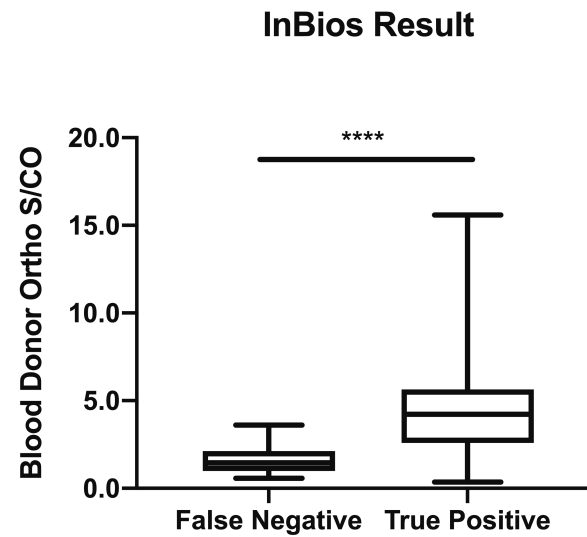

Figure S2. Blood donor Ortho signal-to-cutoff (S/CO) distribution for specimens with false negative and true positive designation by test as compared to blood donor status. \*\*\*\*p<0.0001
